# Supplementary material for: Dimension Reduction of Machine Learning-based Forecasting Models Employing Principal Component Analysis
Source: Preprints.org preprint supplement (doi:10.20944/preprints202007.0397.v1), 2020-07-17
Supplement: Supplementary file 2 [file supplementary]

## Sheet: Sheet1
		Chl	DO	T	SC	Tur	Dot+1
		-0.642125	1.21916	-0.990239	-1.67508	2.25717	1.26005	1.21121	1.1953
		-0.797288	1.26005	-1.08871	-1.48355	1.22451	1.21121	1.1953	1.17031
		-0.852144	1.21121	-1.17689	-1.24126	0.737775	1.1953	1.17031	1.11579
		-0.892894	1.1953	-1.23179	-0.980508	0.42106	1.17031	1.11579	1.07716
		-0.949318	1.17031	-1.22184	-0.775136	0.223015	1.11579	1.07716	0.954482
		-0.974395	1.11579	-1.16042	-0.740523	0.109585	1.07716	0.954482	0.852247
		-0.961856	1.07716	-1.10861	-0.558227	0.085746	0.954482	0.852247	0.878374
		-0.964991	0.954482	-1.0393	-0.334395	0.133162	0.852247	0.878374	0.934035
		-0.935212	0.852247	-0.986808	-0.133639	0.100416	0.878374	0.934035	0.981745
		-0.880356	0.878374	-0.97274	-0.0228766	0.106179	0.934035	0.981745	1.14305
		-0.830202	0.934035	-0.946321	0.256336	0.349282	0.981745	1.14305	1.09875
		-0.656231	0.981745	-0.876669	-0.00672376	1.10243	1.14305	1.09875	1.08512
		-0.480692	1.14305	-0.788147	-0.205173	2.57624	1.09875	1.08512	1.08966
		-0.497932	1.09875	-0.758639	-1.12358	2.08087	1.08512	1.08966	1.08398
		-0.618615	1.08512	-0.787117	-1.31279	1.34396	1.08966	1.08398	0.895413
		-0.745567	1.08966	-0.826232	-1.2528	0.866924	1.08398	0.895413	0.988561
		-0.794154	1.08398	-0.850936	-1.17203	0.529252	0.895413	0.988561	1.12147
		-0.819231	0.895413	-0.828977	-1.10742	0.41032	0.988561	1.12147	1.19417
		-0.776913	0.988561	-0.834467	-1.09819	0.59029	1.12147	1.19417	1.22938
		-0.623317	1.12147	-0.833437	-0.95051	1.22765	1.19417	1.22938	1.25096
		-0.499499	1.19417	-0.872552	-0.902051	1.32562	1.22938	1.25096	1.1953
		-0.604509	1.22938	-0.904118	-1.05896	0.995025	1.25096	1.1953	1.29186
		-0.701683	1.25096	-0.915784	-1.16973	0.71839	1.1953	1.29186	1.43953
		-0.731461	1.1953	-0.913039	-1.3151	0.818984	1.29186	1.43953	1.53268
		-0.544951	1.29186	-0.92196	-1.22972	1.925	1.43953	1.53268	1.52359
		-0.497932	1.43953	-0.92642	-1.49048	2.52149	1.53268	1.52359	1.36683
		-0.47599	1.53268	-0.955242	-1.58047	2.44657	1.52359	1.36683	1.27709
		-0.551221	1.52359	-0.929851	-1.43279	2.07956	1.36683	1.27709	1.30435
		-0.707952	1.36683	-0.848877	-1.64739	1.58209	1.27709	1.30435	1.30435
		-0.770644	1.27709	-0.789862	-2.02121	1.32379	1.30435	1.30435	1.25778
		-0.759673	1.30435	-0.805645	-1.86891	1.32772	1.30435	1.25778	1.20893
		-0.791019	1.30435	-0.824516	-1.93122	1.07126	1.25778	1.20893	1.08966
		-0.797288	1.25778	-0.845446	-1.61508	0.740395	1.20893	1.08966	0.982881
		-0.834904	1.20893	-0.827947	-1.54355	0.483146	1.08966	0.982881	0.928356
		-0.870952	1.08966	-0.748003	-1.55047	0.324134	0.982881	0.928356	0.903365
		-0.885058	0.982881	-0.684527	-1.56432	0.185554	0.928356	0.903365	0.822713
		-0.880356	0.928356	-0.668058	-1.38433	0.0739576	0.903365	0.822713	0.823849
		-0.891327	0.903365	-0.676292	-1.24818	-0.0117047	0.822713	0.823849	0.812489
		-0.864683	0.822713	-0.702369	-1.06589	-0.103654	0.823849	0.812489	0.777275
		-0.883491	0.823849	-0.755894	-0.934357	-0.185649	0.812489	0.777275	0.68072
		-0.86625	0.812489	-0.792264	-0.728985	-0.245901	0.777275	0.68072	0.765916
		-0.853712	0.777275	-0.800155	-0.454387	-0.292007	0.68072	0.765916	0.845432
		-0.874087	0.68072	-0.805302	-0.230556	-0.32973	0.765916	0.845432	0.881782
		-0.877221	0.765916	-0.85471	-0.110563	-0.362213	0.845432	0.881782	0.959026
		-0.858414	0.845432	-0.940831	0.0740403	-0.37374	0.881782	0.959026	0.918132
		-0.831769	0.881782	-1.00568	0.18711	-0.398626	0.959026	0.918132	0.811353
		-0.781615	0.959026	-1.04136	0.286334	-0.410939	0.918132	0.811353	0.784091
		-0.747135	0.918132	-1.03347	0.510166	-0.415392	0.811353	0.784091	0.898821
		-0.692279	0.811353	-1.02078	0.662464	-0.407009	0.784091	0.898821	0.961298
		-0.725192	0.784091	-1.02901	0.530934	-0.371382	0.898821	0.961298	1.07035
		-0.681307	0.898821	-1.01151	0.634774	-0.327896	0.961298	1.07035	1.12601
		-0.687577	0.961298	-1.06813	0.18711	-0.280218	1.07035	1.12601	1.21007
		-0.588836	1.07035	-1.15116	-0.0782577	-0.184863	1.12601	1.21007	1.15782
		-0.526144	1.12601	-1.2263	0.134036	-0.193508	1.21007	1.15782	1.14078
		-0.461884	1.21007	-1.27262	0.424787	-0.278123	1.15782	1.14078	1.22824
		-0.33023	1.15782	-1.26301	0.57247	-0.303271	1.14078	1.22824	1.19076
		-0.30672	1.14078	-1.26987	0.671694	-0.298556	1.22824	1.19076	1.05217
		-0.287912	1.22824	-1.23213	0.927832	-0.175432	1.19076	1.05217	1.00787
		-0.173499	1.19076	-1.15562	0.877066	0.544184	1.05217	1.00787	1.0499
		-0.0104984	1.05217	-1.13297	0.367099	1.04794	1.00787	1.0499	1.04309
		-0.0763255	1.00787	-1.10587	0.150189	0.953896	1.0499	1.04309	1.04195
		-0.206412	1.0499	-1.06023	0.170957	0.921936	1.04309	1.04195	0.99424
		-0.228355	1.04309	-1.02764	-0.0805652	1.09745	1.04195	0.99424	0.938579
		-0.231489	1.04195	-0.999846	-0.103641	0.723367	0.99424	0.938579	0.832936
		-0.339634	0.99424	-0.984063	0.00250642	0.478693	0.938579	0.832936	0.727294
		-0.345903	0.938579	-0.971025	0.0717328	0.280124	0.832936	0.727294	0.812489
		-0.377249	0.832936	-0.940831	0.184802	0.14626	0.727294	0.812489	0.836344
		-0.427403	0.727294	-0.877012	0.277104	0.0514287	0.812489	0.836344	0.771595
		-0.457182	0.812489	-0.889707	-0.00441621	-0.0075133	0.836344	0.771595	0.646642
		-0.491663	0.836344	-0.820399	-0.19825	0.111681	0.771595	0.646642	0.577349
		-0.414865	0.771595	-0.760355	-1.4374	0.10356	0.646642	0.577349	0.59098
		-0.287912	0.646642	-0.711633	-1.58508	0.0687183	0.577349	0.59098	0.608019
		-0.295749	0.577349	-0.671489	-1.31279	-0.0224453	0.59098	0.608019	0.618243
		-0.198576	0.59098	-0.643354	-1.21126	-0.0405208	0.608019	0.618243	0.64437
		-0.0794601	0.608019	-0.667371	-1.24357	0.0957007	0.618243	0.64437	0.701167
		0.0851076	0.618243	-0.698595	-1.04512	0.213847	0.64437	0.701167	0.692079
		0.122723	0.64437	-0.737709	-0.821287	0.12897	0.701167	0.692079	0.615971
		0.0866749	0.701167	-0.738739	-0.745138	0.0150156	0.692079	0.615971	0.501241
		0.0788383	0.692079	-0.73668	-0.58361	-0.0798155	0.615971	0.501241	0.496697
		0.12429	0.615971	-0.716436	-0.438235	-0.141377	0.501241	0.496697	0.648913
		0.132127	0.501241	-0.696193	-0.283629	-0.167312	0.496697	0.648913	0.99424
		0.0443575	0.496697	-0.71026	-0.202865	-0.124087	0.648913	0.99424	1.16009
		0.0302517	0.648913	-0.745944	0.0671177	0.35295	0.99424	1.16009	1.06353
		0.697926	0.99424	-0.85025	0.544779	1.74503	1.16009	1.06353	0.886326
		0.914215	1.16009	-0.961418	0.602468	2.28965	1.06353	0.886326	0.756828
		0.505147	1.06353	-0.937057	0.263259	1.90195	0.886326	0.756828	0.639826
		0.136829	0.886326	-0.843731	0.194033	1.29209	0.756828	0.639826	0.497833
		-0.200143	0.756828	-0.741827	0.101731	0.692718	0.639826	0.497833	0.410365
		-0.320826	0.639826	-0.64404	0.00250642	0.345353	0.497833	0.410365	0.379695
		-0.372547	0.497833	-0.526696	-0.0990256	0.145474	0.410365	0.379695	0.418317
		-0.397624	0.410365	-0.479347	-0.265169	0.0364967	0.379695	0.418317	0.455803
		-0.486961	0.379695	-0.519834	-0.325165	-0.0557148	0.418317	0.455803	0.47057
		-0.490096	0.418317	-0.531499	-0.325165	-0.116752	0.455803	0.47057	0.442172
		-0.472855	0.455803	-0.562036	-0.327473	-0.214989	0.47057	0.442172	0.341073
		-0.477557	0.47057	-0.599092	-0.371316	-0.295674	0.442172	0.341073	0.400142
		-0.544951	0.442172	-0.57679	-0.523614	-0.333397	0.341073	0.400142	0.8318
		-0.443076	0.341073	-0.504051	-0.758983	-0.298294	0.400142	0.8318	0.877238
		-0.14372	0.400142	-0.474543	-1.46971	0.464023	0.8318	0.877238	0.754556
		0.362522	0.8318	-0.513658	-1.65662	2.83952	0.877238	0.754556	0.672768
		0.389166	0.877238	-0.521206	-1.81584	2.98124	0.754556	0.672768	0.821577
		-0.00579647	0.754556	-0.473857	-1.772	1.70233	0.672768	0.821577	0.923812
		-0.297316	0.672768	-0.469396	-1.65431	0.964637	0.821577	0.923812	0.899957
		-0.463451	0.821577	-0.549684	-1.61278	0.684597	0.923812	0.899957	0.888598
		-0.491663	0.923812	-0.603553	-1.46048	0.721272	0.899957	0.888598	1.00219
		-0.505769	0.899957	-0.624826	-1.4074	0.700315	0.888598	1.00219	1.0215
		-0.591971	0.888598	-0.631688	-1.56662	0.613342	1.00219	1.0215	0.961298
		-0.546519	1.00219	-0.624483	-1.22972	0.938964	1.0215	0.961298	0.859063
		-0.508903	1.0215	-0.616934	-1.1005	0.997906	0.961298	0.859063	0.715934
		-0.604509	0.961298	-0.548655	-1.17434	0.676738	0.859063	0.715934	0.54895
		-0.577865	0.859063	-0.473171	-1.15588	0.39303	0.715934	0.54895	0.447851
		-0.570028	0.715934	-0.374011	-1.04512	0.225111	0.54895	0.447851	0.36152
		-0.546519	0.54895	-0.305732	-0.932049	0.0752675	0.447851	0.36152	0.267236
		-0.480692	0.447851	-0.234708	-0.673604	-0.0850548	0.36152	0.267236	0.183176
		-0.417999	0.36152	-0.148244	-0.632068	-0.139281	0.267236	0.183176	0.0298239
		-0.355307	0.267236	-0.0621235	-0.590533	-0.165216	0.183176	0.0298239	0.00937694
		-0.349038	0.183176	0.0346338	-0.546689	-0.282314	0.0298239	0.00937694	0.047999
		-0.403893	0.0298239	0.109432	-0.459003	-0.359593	0.00937694	0.047999	0.195672
		-0.53398	0.00937694	0.120755	-0.465925	-0.399412	0.047999	0.195672	0.359248
		-0.532413	0.047999	0.110118	-0.636684	-0.41382	0.195672	0.359248	0.406957
		-0.422701	0.195672	-0.0123724	-0.775136	-0.448399	0.359248	0.406957	0.400142
		-0.34747	0.359248	-0.148588	-1.03589	-0.460974	0.406957	0.400142	0.363791
		-0.33023	0.406957	-0.166429	-1.01512	-0.466213	0.400142	0.363791	0.275188
		-0.129614	0.400142	-0.124913	-0.84667	-0.468833	0.363791	0.275188	0.176361
		0.136829	0.363791	-0.0827102	-0.648221	-0.454425	0.275188	0.176361	0.0343677
		0.0960787	0.275188	-0.00139288	-0.459003	-0.453639	0.176361	0.0343677	-0.0156138
		0.384464	0.176361	0.106687	-0.255939	-0.470666	0.0343677	-0.0156138	-0.0780908
		0.326473	0.0343677	0.238785	-0.0990256	-0.494243	-0.0156138	-0.0780908	-0.156471
		0.434618	-0.0156138	0.342748	-0.105948	-0.522273	-0.0780908	-0.156471	-0.140568
		0.622695	-0.0780908	0.393528	-0.154407	-0.535896	-0.156471	-0.140568	-0.0917221
		0.436185	-0.156471	0.41034	-0.182097	-0.555019	-0.140568	-0.0917221	-0.0712751
		0.259079	-0.140568	0.381862	-0.267476	-0.566807	-0.0917221	-0.0712751	-0.092858
		0.118021	-0.0917221	0.368824	-0.318242	-0.563664	-0.0712751	-0.092858	-0.112169
		0.0255498	-0.0712751	0.437446	-0.230556	-0.563402	-0.092858	-0.112169	-0.195093
		0.179146	-0.092858	0.523224	-0.21671	-0.570737	-0.112169	-0.195093	-0.253026
		0.0898095	-0.112169	0.544497	-0.438235	-0.55921	-0.195093	-0.253026	-0.303008
		0.243406	-0.195093	0.538664	-0.620531	-0.564974	-0.253026	-0.303008	-0.268929
		0.0537613	-0.253026	0.563025	-0.650529	-0.585145	-0.303008	-0.268929	-0.193957
		-0.109239	-0.303008	0.598022	-0.655144	-0.603744	-0.268929	-0.193957	-0.1258
		0.0161459	-0.268929	0.595963	-0.645914	-0.601649	-0.193957	-0.1258	-0.0712751
		0.18855	-0.193957	0.544154	-0.551304	-0.600339	-0.1258	-0.0712751	-0.123529
		0.353118	-0.1258	0.484795	-0.539767	-0.604006	-0.0712751	-0.123529	-0.183734
		0.281021	-0.0712751	0.519793	-0.546689	-0.615533	-0.123529	-0.183734	-0.270065
		0.25281	-0.123529	0.638509	-0.537459	-0.629679	-0.183734	-0.270065	-0.363213
		0.49731	-0.183734	0.660125	-0.590533	-0.638324	-0.270065	-0.363213	-0.390475
		0.401704	-0.270065	0.706445	-0.745138	-0.638586	-0.363213	-0.390475	-0.366621
		0.249675	-0.363213	0.738355	-0.719755	-0.640681	-0.390475	-0.366621	-0.278017
		-0.03871	-0.390475	0.794625	-0.650529	-0.629679	-0.366621	-0.278017	-0.204181
		-0.16096	-0.366621	0.785018	-0.738216	-0.630465	-0.278017	-0.204181	-0.122393
		-0.0152003	-0.278017	0.705073	-0.772829	-0.626011	-0.204181	-0.122393	-0.168966
		0.169742	-0.204181	0.619295	-0.869746	-0.634656	-0.122393	-0.168966	-0.207588
		0.395435	-0.122393	0.555476	-0.922819	-0.638062	-0.168966	-0.207588	-0.190549
		0.25281	-0.168966	0.616893	-1.0382	-0.64985	-0.207588	-0.190549	-0.171238
		0.100781	-0.207588	0.648116	-1.20203	-0.644087	-0.190549	-0.171238	-0.161015
		0.144665	-0.190549	0.637137	-1.24126	-0.650898	-0.171238	-0.161015	-0.204181
		0.127425	-0.171238	0.618609	-1.05666	-0.648016	-0.161015	-0.204181	-0.360941
		-0.00893109	-0.161015	0.660468	-0.867438	-0.631775	-0.204181	-0.360941	-0.483623
		0.118021	-0.204181	0.725316	-0.742831	-0.63256	-0.360941	-0.483623	-0.508614
		0.138396	-0.360941	0.748991	-0.659759	-0.615533	-0.483623	-0.508614	-0.558595
		0.0427902	-0.483623	0.791537	-0.659759	-0.60715	-0.508614	-0.558595	-0.550643
		-0.063787	-0.508614	0.767176	-0.765906	-0.588812	-0.558595	-0.550643	-0.442729
		-0.253432	-0.558595	0.74007	-0.638991	-0.570475	-0.550643	-0.442729	-0.412058
		-0.352172	-0.550643	0.73012	-0.477463	-0.539301	-0.442729	-0.412058	-0.405243
		-0.261268	-0.442729	0.712621	-0.200558	-0.53118	-0.412058	-0.405243	-0.429097
		-0.0481139	-0.412058	0.669046	-0.096718	-0.500792	-0.405243	-0.429097	-0.463176
		-0.129614	-0.405243	0.604884	-0.117486	-0.484551	-0.429097	-0.463176	-0.531332
		-0.164095	-0.429097	0.569887	-0.253631	-0.470928	-0.463176	-0.531332	-0.629024
		-0.171931	-0.463176	0.622383	-0.32978	-0.473024	-0.531332	-0.629024	-0.719899
		0.0898095	-0.531332	0.726003	-0.175175	-0.458878	-0.629024	-0.719899	-0.659694
		0.287291	-0.629024	0.798399	0.0371196	-0.466999	-0.719899	-0.659694	-0.827814
		0.210492	-0.719899	0.903734	0.230953	-0.468047	-0.659694	-0.827814	-0.970943
		0.498878	-0.659694	1.03103	0.445555	-0.467523	-0.827814	-0.970943	-1.10158
		0.555301	-0.827814	1.03412	0.600161	-0.414606	-0.970943	-1.10158	-1.04932
		0.230867	-0.970943	1.16107	0.738613	-0.416178	-1.10158	-1.04932	-1.20268
		0.113319	-1.10158	1.2091	0.653234	-0.400198	-1.04932	-1.20268	-1.15497
		0.332743	-1.04932	1.33743	0.607083	-0.415654	-1.20268	-1.15497	-1.06295
		0.431483	-1.20268	1.3563	0.68554	-0.419583	-1.15497	-1.06295	-0.952768
		0.318637	-1.15497	1.38169	0.657849	-0.423251	-1.06295	-0.952768	-0.813047
		0.686955	-1.06295	1.37208	0.519396	-0.431896	-0.952768	-0.813047	-0.74489
		1.47061	-0.952768	1.35355	0.500936	-0.437659	-0.813047	-0.74489	-0.861892
		2.41413	-0.813047	1.39164	0.464015	-0.435563	-0.74489	-0.861892	-0.962991
		3.19465	-0.74489	1.40227	0.399404	-0.42718	-0.861892	-0.962991	-0.906194
		2.77775	-0.861892	1.3961	0.394789	-0.43111	-0.962991	-0.906194	-1.04932
		2.45175	-0.962991	1.36522	0.464015	-0.410939	-0.906194	-1.04932	-1.03796
		2.32166	-0.906194	1.37037	0.378636	-0.405175	-1.04932	-1.03796	-0.932321
		1.75273	-1.04932	1.32919	0.323255	-0.397316	-1.03796	-0.932321	-0.855076
		1.30918	-1.03796	1.37105	0.180187	-0.405699	-0.932321	-0.855076	-0.869844
		0.83585	-0.932321	1.42252	0.175572	-0.439493	-0.855076	-0.869844	-1.04251
		0.790397	-0.855076	1.46026	0.267874	-0.412772	-0.869844	-1.04251	-1.0232
		0.577243	-0.869844	1.49766	0.560932	-0.433467	-1.04251	-1.0232	-1.05046
		0.440887	-1.04251	1.44654	0.657849	-0.422203	-1.0232	-1.05046	-0.872116
		0.259079	-1.0232	1.43933	0.757074	-0.410939	-1.05046	-0.872116	-0.691501
		0.218329	-1.05046	1.41634	0.916294	-0.440802	-0.872116	-0.691501	-0.806231
		0.426781	-0.872116	1.43178	0.657849	-0.458092	-0.691501	-0.806231	-0.885747
		0.91108	-0.691501	1.5131	0.872451	-0.456258	-0.806231	-0.885747	-0.814183
		0.983177	-0.806231	1.59201	0.837838	-0.463069	-0.885747	-0.814183	-0.791464
		0.950263	-0.885747	1.6723	0.962445	-0.475382	-0.814183	-0.791464	-1.12089
		1.17439	-0.814183	1.68706	0.897834	-0.47643	-0.791464	-1.12089	-1.29469
		1.50196	-0.791464	1.72205	0.9486	-0.454425	-1.12089	-1.29469	-1.32309
		1.86244	-1.12089	1.74401	0.8263	-0.50053	-1.29469	-1.32309	-1.33104
		1.36403	-1.29469	1.73955	0.812455	-0.469357	-1.32309	-1.33104	-1.08681
		1.71668	-1.32309	1.77215	0.766304	-0.512843	-1.33104	-1.08681	-1.00161
		2.39846	-1.33104	1.78759	0.740921	-0.507603	-1.08681	-1.00161	-1.01865
		5.0096	-1.08681	1.80406	0.699385	-0.490052	-1.00161	-1.01865	-1.05046
		6.44055	-1.00161	1.82773	0.59093	-0.463593	-1.01865	-1.05046	-1.17768
		6.20389	-1.01865	1.84523	0.489398	-0.485336	-1.05046	-1.17768	-1.19472
		5.36068	-1.05046	1.87405	0.542472	-0.475382	-1.17768	-1.19472	-1.26061
		3.40154	-1.17768	1.87405	0.715538	-0.492409	-1.19472	-1.26061	-1.35035
		3.01441	-1.19472	1.84386	0.796302	-0.488218	-1.26061	-1.35035	-1.27538
		2.50033	-1.26061	1.83562	0.842453	-0.474858	-1.35035	-1.27538	-1.51279
		2.53638	-1.35035	1.87474	0.798609	-0.473286	-1.27538	-1.51279	-1.84108
		3.67268	-1.27538	1.92552	0.72246	-0.439493	-1.51279	-1.84108	-2.12279
		1.96431	-1.51279	1.95331	0.584008	-0.44185	-1.84108	-2.12279	-2.23638
		0.39857	-1.84108	1.95468	0.632466	-0.386314	-2.12279	-2.23638	-2.19435
		-0.193874	-2.12279	1.93272	0.708615	-0.361951	-2.23638	-2.19435	-2.08871
		-0.548086	-2.23638	1.91694	0.83553	-0.393387	-2.19435	-2.08871	-1.94217
		-0.518307	-2.19435	1.89601	0.863221	-0.422989	-2.08871	-1.94217	-1.87175
		0.221464	-2.08871	1.89121	1.06628	-0.449185	-1.94217	-1.87175	-1.89787
		0.796667	-1.94217	1.89773	0.653234	-0.443422	-1.87175	-1.89787	-1.95581
		0.926754	-1.87175	1.90459	0.567855	-0.429538	-1.89787	-1.95581	-1.92741
		0.824878	-1.89787	1.92243	0.674002	-0.364833	-1.95581	-1.92741	-1.94558
		0.0271171	-1.95581	1.89567	0.710923	-0.382646	-1.92741	-1.94558	-2.02737
		-0.0622197	-1.92741	1.85621	0.542472	-0.360117	-1.94558	-2.02737	-2.03191
		-0.270672	-1.94558	1.78141	0.604776	-0.391815	-2.02737	-2.03191	-2.0251
		-0.722058	-2.02737	1.73612	0.434017	-0.410153	-2.03191	-2.0251	-2.02964
		-0.786317	-2.03191	1.71965	0.424787	-0.44709	-2.0251	-2.02964	-2.02737
		-0.53398	-2.0251	1.71348	0.311717	-0.447352	-2.02964	-2.02737	-2.01147
		-0.34747	-2.02964	1.74744	0.424787	-0.436611	-2.02737	-2.01147	-1.98193
		-0.45248	-2.02737	1.73544	0.385559	-0.448661	-2.01147	-1.98193	-1.83312
		-0.422701	-2.01147	1.73784	0.29095	-0.442112	-1.98193	-1.83312	-1.7502
		-0.322393	-1.98193	1.72549	0.454785	-0.442636	-1.83312	-1.7502	-1.73998
		0.274752	-1.83312	1.68774	0.397097	-0.432158	-1.7502	-1.73998	-1.70135
		0.564705	-1.7502	1.64417	0.242491	-0.452853	-1.73998	-1.70135	-1.84903
		0.386031	-1.73998	1.63044	0.226338	-0.449447	-1.70135	-1.84903	-1.84789
		0.390733	-1.70135	1.64074	0.274797	-0.452591	-1.84903	-1.84789	-1.79677
		-0.344336	-1.84903	1.55393	0.339408	-0.440802	-1.84789	-1.79677	-1.82176
		-0.546519	-1.84789	1.48908	0.443248	-0.419583	-1.79677	-1.82176	-1.75474
		-0.543384	-1.79677	1.44688	0.357868	-0.428228	-1.82176	-1.75474	-1.67068
		-0.563759	-1.82176	1.38032	0.320948	-0.403604	-1.75474	-1.67068	-1.63774
		-0.668769	-1.75474	1.346	0.263259	-0.444732	-1.67068	-1.63774	-1.45258
		-0.454047	-1.67068	1.34154	0.159419	-0.453639	-1.63774	-1.45258	-1.22994
		-0.319259	-1.63774	1.34669	0.244799	-0.459402	-1.45258	-1.22994	-1.16633
		-0.341201	-1.45258	1.30689	0.452478	-0.44709	-1.22994	-1.16633	-1.2731
		-0.311422	-1.22994	1.26023	0.560932	-0.451543	-1.16633	-1.2731	-1.3424
		-0.187605	-1.16633	1.20018	0.556317	-0.434515	-1.2731	-1.3424	-1.2731
		0.154069	-1.2731	1.16244	0.436325	-0.45652	-1.3424	-1.2731	-1.1243
		0.420512	-1.3424	1.15421	0.348638	-0.482979	-1.2731	-1.1243	-0.98571
		1.35776	-1.2731	1.16999	0.380944	-0.466213	-1.1243	-0.98571	-1.06182
		3.34041	-1.1243	1.21974	0.480168	-0.431372	-0.98571	-1.06182	-1.26629
		5.03468	-0.98571	1.26983	0.5817	-0.419321	-1.06182	-1.26629	-1.19359
		4.75883	-1.06182	1.27121	0.770919	-0.408057	-1.26629	-1.19359	-1.35716
		2.72446	-1.26629	1.2441	0.904757	-0.448137	-1.19359	-1.35716	-1.47076
		2.24643	-1.19359	1.22489	0.920909	-0.428228	-1.35716	-1.47076	-1.44804
		0.845253	-1.35716	1.19435	0.724768	-0.464903	-1.47076	-1.44804	-1.42646
		0.337445	-1.47076	1.15489	0.584008	-0.470666	-1.44804	-1.42646	-1.48325
		0.201089	-1.44804	1.14906	0.505551	-0.506556	-1.42646	-1.48325	-1.38897
		0.146233	-1.42646	1.11715	0.521704	-0.498173	-1.48325	-1.38897	-1.32536
		0.0396555	-1.48325	1.06808	0.270182	-0.476954	-1.38897	-1.32536	-1.2731
		0.0929441	-1.38897	1.01559	0.595545	-0.52044	-1.32536	-1.2731	-1.21744
		0.266916	-1.32536	0.980591	0.890911	-0.529346	-1.2731	-1.21744	-1.11748
		0.191685	-1.2731	0.916086	0.842453	-0.557115	-1.21744	-1.11748	-1.05046
		0.205791	-1.21744	0.844033	0.678617	-0.558686	-1.11748	-1.05046	-1.04364
		0.224598	-1.11748	0.787763	0.766304	-0.555805	-1.05046	-1.04364	-0.99139
		0.246541	-1.05046	0.753451	1.08013	-0.563664	-1.04364	-0.99139	-0.970943
		0.406406	-1.04364	0.729777	1.0709	-0.583049	-0.99139	-0.970943	-0.975487
		0.53806	-0.99139	0.692378	1.03167	-0.577548	-0.970943	-0.975487	-0.926641
		0.422079	-0.970943	0.645028	1.00167	-0.554495	-0.975487	-0.926641	-0.918689
		0.244973	-0.975487	0.624442	0.888604	-0.575714	-0.926641	-0.918689	-0.952768
		0.241839	-0.926641	0.621354	0.655542	-0.574142	-0.918689	-0.952768	-1.01752
		0.360954	-0.918689	0.641597	0.67631	-0.536157	-0.952768	-1.01752	-1.0391
		0.560003	-0.952768	0.670419	0.805532	-0.549518	-1.01752	-1.0391	-1.0993
		0.450291	-1.01752	0.695466	0.893219	-0.569427	-1.0391	-1.0993	-1.13565
		0.679118	-1.0391	0.682084	0.791687	-0.549518	-1.0993	-1.13565	-1.1277
		0.379762	-1.0993	0.666301	0.579393	-0.569951	-1.13565	-1.1277	-1.12089
		-0.084162	-1.13565	0.638166	0.408634	-0.574666	-1.1277	-1.12089	-1.1243
		-0.176633	-1.1277	0.621011	0.404019	-0.583835	-1.12089	-1.1243	-1.14701
		-0.24873	-1.12089	0.614491	0.556317	-0.595361	-1.1243	-1.14701	-1.10044
		-0.0919986	-1.1243	0.626157	0.706308	-0.588812	-1.14701	-1.10044	-1.06295
		-0.275374	-1.14701	0.568858	0.985521	-0.586193	-1.10044	-1.06295	-1.04251
		-0.259701	-1.10044	0.507098	0.733998	-0.577286	-1.06295	-1.04251	-0.972079
		-0.26597	-1.06295	0.454945	0.491706	-0.574142	-1.04251	-0.972079	-0.935729
		-0.37098	-1.04251	0.44225	0.466323	-0.585145	-0.972079	-0.935729	-0.873252
		-0.446211	-0.972079	0.419261	0.768611	-0.590384	-0.935729	-0.873252	-0.789192
		-0.560625	-0.935729	0.382548	0.9486	-0.587764	-0.873252	-0.789192	-0.740346
		-0.417999	-0.873252	0.28785	0.886296	-0.574142	-0.789192	-0.740346	-0.728987
		-0.381951	-0.789192	0.254225	1.01321	-0.565498	-0.740346	-0.728987	-0.734666
		-0.486961	-0.740346	0.212708	1.0086	-0.570213	-0.728987	-0.734666	-0.705132
		-0.560625	-0.728987	0.186289	0.909372	-0.573094	-0.734666	-0.705132	-0.703996
		-0.403893	-0.734666	0.18423	0.943985	-0.569951	-0.705132	-0.703996	-0.685821
		-0.405461	-0.705132	0.190749	0.798609	-0.571523	-0.703996	-0.685821	-0.674461
		-0.367845	-0.703996	0.189377	0.699385	-0.566807	-0.685821	-0.674461	-0.635839
		-0.358441	-0.685821	0.176682	0.71323	-0.577024	-0.674461	-0.635839	-0.608577
		-0.419567	-0.674461	0.149919	0.787072	-0.573356	-0.635839	-0.608577	-0.607441
		-0.527711	-0.635839	0.104628	0.69477	-0.557901	-0.608577	-0.607441	-0.629024
		-0.436807	-0.608577	0.0734053	0.609391	-0.558163	-0.607441	-0.629024	-0.656286
		-0.474422	-0.607441	0.0559067	0.560932	-0.56052	-0.629024	-0.656286	-0.661966
		-0.422701	-0.629024	0.0288009	0.560932	-0.555805	-0.656286	-0.661966	-0.66651
		-0.523009	-0.656286	0.0281147	0.607083	-0.564974	-0.661966	-0.66651	-0.665374
		-0.601375	-0.661966	0.00512623	0.57247	-0.556853	-0.66651	-0.665374	-0.668782
		-0.634288	-0.66651	0.00100889	0.623236	-0.562878	-0.665374	-0.668782	-0.686957
		-0.76124	-0.665374	0.0130178	0.697077	-0.573618	-0.668782	-0.686957	-0.643791
		-0.709519	-0.668782	0.0188507	0.789379	-0.474596	-0.686957	-0.643791	-0.599489
		-0.787885	-0.686957	0.0246836	1.18397	-0.467261	-0.643791	-0.599489	-0.581314
		-0.772212	-0.643791	0.0195369	1.96623	-0.50315	-0.599489	-0.581314	-0.625616
		-0.775346	-0.599489	-0.000706661	2.25698	-0.524107	-0.581314	-0.625616	-0.638111
		-0.803558	-0.581314	0.038408	2.45773	-0.532228	-0.625616	-0.638111	-0.566547
		-0.867817	-0.625616	0.0469858	2.06545	-0.561568	-0.638111	-0.566547	-0.548372
		-0.817664	-0.638111	0.0308596	1.30165	-0.577286	-0.566547	-0.548372	-0.556323
		-0.845875	-0.566547	0.0140471	0.810147	-0.589598	-0.548372	-0.556323	-0.548372
		-0.828635	-0.548372	-0.0291849	0.360176	-0.590384	-0.556323	-0.548372	-0.505206
		-0.798856	-0.556323	-0.0339884	0.194033	-0.595361	-0.548372	-0.505206	-0.499526
		-0.834904	-0.548372	-0.0470267	0.0763479	-0.593528	-0.505206	-0.499526	-0.474535
		-0.86625	-0.505206	-0.0844258	-0.0990256	-0.585407	-0.499526	-0.474535	-0.465448
		-0.831769	-0.499526	-0.135892	-0.0690275	-0.61789	-0.474535	-0.465448	-0.435913
		-0.872519	-0.474535	-0.208289	0.0625026	-0.626273	-0.465448	-0.435913	-0.356397
		-0.877221	-0.465448	-0.274852	0.106346	-0.624178	-0.435913	-0.356397	-0.260978
		-0.834904	-0.435913	-0.337985	0.0486573	-0.630727	-0.356397	-0.260978	-0.174646
		-0.812962	-0.356397	-0.442977	0.0694252	-0.636228	-0.260978	-0.174646	-0.1258
		-0.856846	-0.260978	-0.524294	0.16865	-0.639633	-0.174646	-0.1258	-0.0417405
		-0.878789	-0.174646	-0.587427	0.438632	-0.642253	-0.1258	-0.0417405	-0.00539034
		-0.844308	-0.1258	-0.629972	0.833223	-0.640943	-0.0417405	-0.00539034	0.0184645
		-0.902298	-0.0417405	-0.686929	1.09859	-0.647754	-0.00539034	0.0184645	0.0593585
		-0.86625	-0.00539034	-0.730504	1.12859	-0.668973	0.0184645	0.0593585	0.0604944
		-0.888193	0.0184645	-0.766874	1.21628	-0.680238	0.0593585	0.0604944	0.0230083
		-0.867817	0.0593585	-0.816625	1.22551	-0.689407	0.0604944	0.0230083	-0.0247014
		-0.856846	0.0604944	-0.842015	1.3155	-0.690978	0.0230083	-0.0247014	-0.0655954
		-0.729894	0.0230083	-0.825203	1.35934	-0.69124	-0.0247014	-0.0655954	0.102524
		-0.8255	-0.0247014	-0.79295	1.47934	-0.674213	-0.0655954	0.102524	0.297907
		-0.881923	-0.0655954	-0.764472	1.64317	-0.670021	0.102524	0.297907	0.324033
		-0.845875	0.102524	-0.814223	1.93623	-0.671069	0.297907	0.324033	0.209303
		-0.795721	0.297907	-0.856426	2.30774	-0.673427	0.324033	0.209303	0.406957
		-0.806692	0.324033	-0.840643	2.25929	-0.635442	0.209303	0.406957	0.487609
		-0.696981	0.209303	-0.801185	2.03315	-0.508651	0.406957	0.487609	0.446715
		-0.591971	0.406957	-0.783343	0.251721	-0.475644	0.487609	0.446715	0.475114
		-0.552788	0.487609	-0.715064	-0.177482	-0.399412	0.446715	0.475114	0.580757
		-0.529278	0.446715	-0.662568	-0.18902	-0.320037	0.475114	0.580757	0.715934
		-0.523009	0.475114	-0.681439	-0.572072	-0.294102	0.580757	0.715934	0.787499
		-0.548086	0.580757	-0.765501	-0.666682	-0.296722	0.715934	0.787499	0.797722
		-0.682875	0.715934	-0.8602	-0.456695	-0.263191	0.787499	0.797722	0.760236
		-0.665634	0.787499	-0.948036	-0.378238	-0.282838	0.797722	0.760236	0.817033
		-0.723625	0.797722	-1.02421	-0.401314	-0.317941	0.760236	0.817033	0.87383
		-0.681307	0.760236	-1.10758	-0.495923	-0.352782	0.817033	0.87383	0.903365
		-0.695413	0.817033	-1.18959	-0.558227	-0.378455	0.87383	0.903365	0.947667
		-0.651529	0.87383	-1.23865	-0.505153	-0.419845	0.903365	0.947667	0.953346
		-0.659365	0.903365	-1.25684	-0.31132	-0.428228	0.947667	0.953346	1.14305
		-0.656231	0.947667	-1.25443	-0.0782577	-0.420631	0.953346	1.14305	1.04649
		-0.602942	0.953346	-1.21017	0.161727	-0.298032	1.14305	1.04649	0.973793
		-0.632721	1.14305	-1.134	-0.0597973	-0.351473	1.04649	0.973793	0.934035
		-0.656231	1.04649	-1.04102	0.350946	-0.120158	0.973793	0.934035	0.912452
		-0.595105	0.973793	-0.996072	0.376329	0.0338771	0.934035	0.912452	0.947667
		-0.63899	0.934035	-0.979259	-0.396699	-0.110465	0.912452	0.947667	1.05331
		-0.717356	0.912452	-0.980632	-0.535152	-0.222848	0.947667	1.05331	0.985153
		-0.272239	0.947667	-0.971025	-0.72437	0.641635	1.05331	0.985153	1.03173
		0.196387	1.05331	-0.843044	-0.825902	4.21116	0.985153	1.03173	1.08512
		0.321772	0.985153	-0.745258	-1.13742	3.75954	1.03173	1.08512	1.14873
		-0.0120657	1.03173	-0.778539	-1.52509	2.07248	1.08512	1.14873	1.2078
		-0.305153	1.08512	-0.846475	-1.21126	1.31934	1.14873	1.2078	1.30095
		-0.353739	1.14873	-0.919558	-1.40279	1.05475	1.2078	1.30095	1.26232
		-0.360009	1.2078	-0.961075	-1.53201	1.27349	1.30095	1.26232	1.25892
		-0.300451	1.30095	-0.907892	-1.33818	1.5352	1.26232	1.25892	1.28163
		-0.396057	1.26232	-0.890394	-1.50663	1.12391	1.25892	1.28163	1.20325
		-0.529278	1.25892	-0.899315	-1.45817	0.728083	1.28163	1.20325	1.08966
		-0.601375	1.28163	-0.950095	-1.26895	0.410058	1.20325	1.08966	1.16918
		-0.701683	1.20325	-0.939115	-1.13973	0.273836	1.08966	1.16918	1.20553
		-0.706384	1.08966	-0.919215	-1.18357	0.26493	1.16918	1.20553	1.1953
		-0.76751	1.16918	-0.922303	-0.994353	0.302391	1.20553	1.1953	1.18849
		-0.803558	1.20553	-0.969652	-1.28972	0.327539	1.1953	1.18849	1.16009
		-0.828635	1.1953	-1.06675	-1.43279	0.0970105	1.18849	1.16009	1.03513
		-0.841173	1.18849	-1.14052	-1.30587	-0.046808	1.16009	1.03513	0.909045
		-0.869385	1.16009	-1.16488	-1.12588	-0.122516	1.03513	0.909045	0.940851
		-0.863116	1.03513	-1.1141	-1.04281	-0.174909	0.909045	0.940851	0.988561
		-0.878789	0.909045	-1.05955	-0.9782	-0.182244	0.940851	0.988561	0.987425
		-0.907	0.940851	-1.02455	-0.902051	-0.163644	0.988561	0.987425	1.05445
		-0.899164	0.988561	-1.03827	-0.835132	-0.134042	0.987425	1.05445	1.02264
		-0.885058	0.987425	-1.05989	-0.657451	-0.0779817	1.05445	1.02264	0.945395
		-0.852144	1.05445	-1.04411	-0.403621	0.0579778	1.02264	0.945395	0.944259
		-0.765942	1.02264	-1.00225	-0.258246	0.249212	0.945395	0.944259	0.986289
		-0.750269	0.945395	-0.947693	-0.336703	0.4077	0.944259	0.986289	1.04877
		-0.780048	0.944259	-0.960045	-0.537459	0.23559	0.986289	1.04877	1.10216
		-0.806692	0.986289	-1.03896	-0.60207	0.0708141	1.04877	1.10216	1.08625
		-0.820798	1.04877	-1.14464	-0.60207	-0.046808	1.10216	1.08625	1.11011
		-0.786317	1.10216	-1.21326	-0.578995	-0.129065	1.08625	1.11011	1.14078
		-0.751836	1.08625	-1.23316	-0.509769	-0.184339	1.11011	1.14078	1.20212
		-0.76751	1.11011	-1.21841	-0.396699	-0.130637	1.14078	1.20212	1.31685
		-0.629586	1.14078	-1.1467	-0.375931	0.522703	1.20212	1.31685	1.36683
		-0.319259	1.20212	-1.00122	-0.0390294	2.35383	1.31685	1.36683	1.33957
		-0.157826	1.31685	-0.915784	-1.04281	1.99285	1.36683	1.33957	1.30208
		-0.0919986	1.36683	-0.930195	-1.17896	1.85689	1.33957	1.30208	1.2521
		-0.20171	1.33957	-0.925048	-1.17896	1.40683	1.30208	1.2521	1.22711
		-0.421134	1.30208	-0.922989	-0.971278	0.932677	1.2521	1.22711	1.10783
		-0.488528	1.2521	-0.898628	-1.1605	0.681453	1.22711	1.10783	1.12033
		-0.576298	1.22711	-0.917843	-1.28741	0.380456	1.10783	1.12033	1.13396
		-0.62175	1.10783	-0.9573	-1.17896	0.202844	1.12033	1.13396	1.08625
		-0.649961	1.12033	-1.02935	-0.989738	0.0611214	1.13396	1.08625	1.05331
		-0.649961	1.13396	-1.07224	-0.892821	-0.0368533	1.08625	1.05331	1.00106
		-0.693846	1.08625	-1.06813	-0.814364	-0.102082	1.05331	1.00106	0.91586
		-0.715788	1.05331	-1.06366	-0.758983	-0.173075	1.00106	0.91586	0.84316
		-0.687577	1.00106	-1.08322	-0.608993	-0.233851	0.91586	0.84316	0.776139
		-0.682875	0.91586	-1.08803	-0.345933	-0.288077	0.84316	0.776139	0.792042
		-0.67974	0.84316	-1.08631	-0.0621048	-0.314012	0.776139	0.792042	0.872694
		-0.717356	0.776139	-1.07876	0.203263	-0.32973	0.792042	0.872694	0.981745
		-0.764375	0.792042	-1.04685	0.464015	-0.322656	0.872694	0.981745	1.07716
		-0.772212	0.872694	-1.04514	0.558625	-0.267906	0.981745	1.07716	1.07603
		-0.681307	0.981745	-1.11685	0.72246	-0.098153	1.07716	1.07603	1.1351
		-0.617048	1.07716	-1.22836	1.08936	-0.0258508	1.07603	1.1351	1.20098
		-0.562192	1.07603	-1.31997	1.27166	-0.0329238	1.1351	1.20098	1.32934
		-0.546519	1.1351	-1.38104	1.3755	-0.0436644	1.20098	1.32934	1.48383
		-0.57473	1.20098	-1.37246	1.58548	0.0716	1.32934	1.48383	1.33389
		-0.363143	1.32934	-1.31825	1.84623	1.32274	1.48383	1.33389	1.3089
		0.434618	1.48383	-1.23522	1.72624	6.03889	1.33389	1.3089	1.30435
		0.447156	1.33389	-1.16454	0.625544	4.75448	1.3089	1.30435	1.38614
		0.144665	1.3089	-1.10038	0.457093	3.13554	1.30435	1.38614	1.42931
		-0.0402773	1.30435	-1.07499	0.353253	2.27079	1.38614	1.42931	1.35093
		-0.117076	1.38614	-1.07773	0.0255819	1.95224	1.42931	1.35093	1.16009
		-0.218951	1.42931	-1.0966	-0.0690275	1.61405	1.35093	1.16009	1.17486
		-0.261268	1.35093	-1.13229	-0.0921029	1.14303	1.16009	1.17486	1.18962
		-0.320826	1.16009	-1.12062	0.0232743	0.858279	1.17486	1.18962	1.16577
		-0.408595	1.17486	-1.1117	0.189418	0.619106	1.18962	1.16577	1.14646
		-0.350605	1.18962	-1.12645	0.334793	0.56907	1.16577	1.14646	1.39977
		-0.270672	1.16577	-1.12817	0.43171	0.580597	1.14646	1.39977	1.63378
		-0.18447	1.14646	-1.13846	0.646311	0.729393	1.39977	1.63378	1.79395
		-0.0230369	1.39977	-1.15528	0.604776	2.44159	1.63378	1.79395	1.73374
		0.644638	1.63378	-1.2486	-0.267476	4.42126	1.79395	1.73374	1.50769
		0.354685	1.79395	-1.40849	-0.489001	2.8217	1.73374	1.50769	1.38728
		0.144665	1.73374	-1.39614	0.0878856	1.69368	1.50769	1.38728	1.30322
		0.00987664	1.50769	-1.33095	0.42248	1.10846	1.38728	1.30322	1.27027
		-0.0684889	1.38728	-1.29183	0.692462	0.749826	1.30322	1.27027	1.27027
		-0.0481139	1.30322	-1.24105	0.920909	0.531871	1.27027	1.27027	1.22143
		0.031819	1.27027	-1.21875	0.997058	0.431801	1.27027	1.22143	1.27482
		0.0929441	1.27027	-1.24894	0.888604	0.349282	1.22143	1.27482	1.31344
		0.0913768	1.22143	-1.286	0.782457	0.286149	1.27482	1.31344	1.3123
		0.105483	1.27482	-1.3083	0.754766	0.199439	1.31344	1.3123	1.29186
		0.48007	1.31344	-1.32923	0.803225	0.136829	1.3123	1.29186	1.21348
		0.801369	1.3123	-1.29595	0.81707	0.111419	1.29186	1.21348	1.04763
		0.8766	1.29186	-1.24792	0.782457	0.138139	1.21348	1.04763	1.01582
		1.05527	1.21348	-1.17449	0.717845	0.193151	1.04763	1.01582	0.979473
		1.15401	1.04763	-1.07567	0.763996	0.20625	1.01582	0.979473	0.880646
		1.03333	1.01582	-0.996072	0.72246	0.152285	0.979473	0.880646	0.810218
		1.07095	0.979473	-0.898971	0.623236	0.147308	0.880646	0.810218	0.745469
		0.865628	0.880646	-0.823144	0.420172	0.158572	0.810218	0.745469	0.676176
		0.563137	0.810218	-0.796038	-0.0413369	0.175076	0.745469	0.676176	0.583029
		0.348416	0.745469	-0.754179	-0.103641	0.0511667	0.676176	0.583029	0.503513
		0.226166	0.676176	-0.695507	-0.156714	-0.0544049	0.583029	0.503513	0.505784
		0.113319	0.583029	-0.611444	-0.279014	-0.132732	0.503513	0.505784	0.513736
		0.135262	0.503513	-0.529441	-0.59284	-0.185125	0.505784	0.513736	0.589844
		0.141531	0.505784	-0.514687	-1.03358	-0.213155	0.513736	0.589844	0.671632
		0.0036074	0.513736	-0.522579	-1.46509	-0.250354	0.589844	0.671632	0.631874
		0.00830933	0.589844	-0.579192	-1.72123	-0.263715	0.671632	0.631874	0.648913
		0.0443575	0.671632	-0.62311	-1.66585	-0.305629	0.631874	0.648913	0.579621
		0.0490594	0.631874	-0.665313	-1.5274	-0.319513	0.648913	0.579621	0.617107
		-0.0951332	0.648913	-0.652618	-1.51817	-0.339422	0.579621	0.617107	0.631874
		-0.0465466	0.579621	-0.664627	-1.54124	-0.347543	0.617107	0.631874	0.597796
		0.0036074	0.617107	-0.654333	-1.41894	-0.380551	0.631874	0.597796	0.500105
		0.0866749	0.631874	-0.622767	-1.25741	-0.395745	0.597796	0.500105	0.387646
		0.276319	0.597796	-0.561007	-1.07512	-0.387362	0.500105	0.387646	0.303586
		0.422079	0.500105	-0.4742	-1.05666	-0.391291	0.387646	0.303586	0.296771
		0.519253	0.387646	-0.404548	-1.07973	-0.397054	0.303586	0.296771	0.39219
		0.514551	0.303586	-0.380187	-1.1628	-0.420107	0.296771	0.39219	0.435356
		0.373493	0.296771	-0.356856	-1.25741	-0.435301	0.39219	0.435356	0.551222
		0.196387	0.39219	-0.369208	-1.38202	-0.358808	0.435356	0.551222	0.865879
		0.343714	0.435356	-0.399059	-1.50432	-0.0798155	0.551222	0.865879	1.13851
		0.451858	0.551222	-0.469053	-1.85507	0.404557	0.865879	1.13851	1.24983
		1.6963	0.865879	-0.615562	-2.0189	3.67518	1.13851	1.24983	1.18281
		1.48001	1.13851	-0.682125	-2.42042	6.79937	1.24983	1.18281	1.13964
		0.682253	1.24983	-0.629972	-2.81962	6.58692	1.18281	1.13964	1.18508
		0.349983	1.18281	-0.563066	-2.73886	6.34408	1.13964	1.18508	1.24983
		0.110185	1.13964	-0.55689	-2.76655	5.87778	1.18508	1.24983	1.27823
		-0.170364	1.18508	-0.545224	-2.95346	4.3817	1.24983	1.27823	1.24983
		-0.364711	1.24983	-0.579878	-3.07576	3.20496	1.27823	1.24983	1.25892
		-0.433672	1.27823	-0.605268	-2.91192	2.36353	1.24983	1.25892	1.13396
		-0.458749	1.24983	-0.645069	-2.70655	1.89487	1.25892	1.13396	0.861335
		-0.45248	1.25892	-0.657421	-2.62117	1.59702	1.13396	0.861335	0.614835
		-0.466586	1.13396	-0.586054	-2.39273	1.39085	0.861335	0.614835	0.497833
		-0.367845	0.861335	-0.428909	-2.16428	1.13308	0.614835	0.497833	0.469434
		-0.292614	0.614835	-0.31534	-1.9266	0.835226	0.497833	0.469434	0.417181
		-0.302018	0.497833	-0.270392	-1.72354	0.598672	0.469434	0.417181	0.316082
		-0.300451	0.469434	-0.2625	-1.5274	0.377574	0.417181	0.316082	0.282004
		-0.291047	0.417181	-0.252893	-1.36587	0.218038	0.316082	0.282004	0.196808
		-0.287912	0.316082	-0.264216	-1.25049	0.0957007	0.282004	0.196808	0.143418
		-0.308287	0.282004	-0.207603	-1.19742	-0.0122287	0.196808	0.143418	0.0957087
		-0.0355754	0.196808	-0.155107	-1.00358	-0.106536	0.143418	0.0957087	0.0843492
		0.251243	0.143418	-0.078936	-0.814364	-0.160239	0.0957087	0.0843492	0.0820774
		0.315502	0.0957087	-0.0453111	-0.775136	-0.195604	0.0843492	0.0820774	0.129787
		0.390733	0.0843492	-0.0473698	-0.632068	-0.211584	0.0820774	0.129787	0.113884
		0.558435	0.0820774	-0.0477129	-0.608993	-0.233327	0.129787	0.113884	0.0650382
		0.655609	0.129787	-0.069672	-0.7336	-0.260571	0.113884	0.0650382	0.0218723
		0.78883	0.113884	-0.0600649	-0.768214	-0.280218	0.0650382	0.0218723	-0.0360608
		0.780994	0.0650382	-0.0257538	-0.710525	-0.31113	0.0218723	-0.0360608	-0.112169
		0.821744	0.0218723	0.0281147	-0.477463	-0.353044	-0.0360608	-0.112169	-0.162151
		1.06938	-0.0360608	0.0926195	-0.195942	-0.377407	-0.112169	-0.162151	-0.220084
		1.27626	-0.112169	0.148547	0.00942906	-0.393125	-0.162151	-0.220084	-0.290512
		1.68063	-0.162151	0.237412	0.150189	-0.42849	-0.220084	-0.290512	-0.312095
		2.35771	-0.220084	0.342404	0.355561	-0.479573	-0.290512	-0.312095	-0.379116
		2.63826	-0.290512	0.444995	0.505551	-0.520178	-0.312095	-0.379116	-0.482487
		3.48774	-0.312095	0.5493	0.454785	-0.540873	-0.379116	-0.482487	-0.533604
		3.37176	-0.379116	0.647087	0.397097	-0.553709	-0.482487	-0.533604	-0.569955
		2.55362	-0.482487	0.708504	0.376329	-0.555543	-0.533604	-0.569955	-0.601761
		1.71825	-0.533604	0.752765	0.247106	-0.579906	-0.569955	-0.601761	-0.565411
		1.13521	-0.569955	0.77095	-0.0528747	-0.598243	-0.601761	-0.565411	-0.549508
		0.763753	-0.601761	0.707818	-0.389776	-0.595885	-0.565411	-0.549508	-0.458632
		0.448724	-0.565411	0.610031	-0.636684	-0.594576	-0.549508	-0.458632	-0.355261
		0.356252	-0.549508	0.499892	-0.69668	-0.586979	-0.458632	-0.355261	-0.310959
		0.163473	-0.458632	0.383235	-0.535152	-0.589598	-0.355261	-0.310959	-0.268929
		0.0819729	-0.355261	0.300888	-0.408237	-0.580168	-0.310959	-0.268929	-0.285969
		0.29356	-0.310959	0.221286	-0.315935	-0.540087	-0.268929	-0.285969	-0.346174
		0.360954	-0.268929	0.163987	-0.237478	-0.54454	-0.285969	-0.346174	-0.363213
		0.169742	-0.285969	0.18423	-0.30209	-0.547422	-0.346174	-0.363213	-0.448409
		0.0741364	-0.346174	0.282017	-0.283629	-0.559996	-0.363213	-0.448409	-0.488167
		0.158771	-0.363213	0.354413	-0.253631	-0.56183	-0.448409	-0.488167	-0.46772
		0.29356	-0.448409	0.39044	-0.212095	-0.552923	-0.488167	-0.46772	-0.431369
		0.0145786	-0.488167	0.358531	-0.401314	-0.561044	-0.46772	-0.431369	-0.388203
		-0.139018	-0.46772	0.381176	-0.728985	-0.553447	-0.431369	-0.388203	-0.318911
		-0.0857293	-0.431369	0.391126	-0.809749	-0.543231	-0.388203	-0.318911	-0.326863
		-0.117076	-0.388203	0.315299	-0.754368	-0.541921	-0.318911	-0.326863	-0.321183
		-0.237758	-0.318911	0.331768	-0.812057	-0.551351	-0.326863	-0.321183	-0.413194
		0.113319	-0.326863	0.385293	-0.934357	-0.541921	-0.321183	-0.413194	-0.527925
		0.53806	-0.321183	0.449798	-0.851285	-0.547684	-0.413194	-0.527925	-0.657422
		0.575676	-0.413194	0.541066	-0.802827	-0.534062	-0.527925	-0.657422	-0.717627
		0.663445	-0.527925	0.671448	-0.738216	-0.546898	-0.657422	-0.717627	-0.826678
		0.607022	-0.657422	0.810751	-0.692065	-0.566283	-0.717627	-0.826678	-0.875523
		0.773157	-0.717627	0.961377	-0.650529	-0.575714	-0.826678	-0.875523	-0.844853
		0.768455	-0.826678	0.968582	-0.689757	-0.574404	-0.875523	-0.844853	-0.788056
		0.732407	-0.875523	0.965837	-0.615916	-0.563664	-0.844853	-0.788056	-0.673325
		0.458128	-0.844853	0.900646	-0.555919	-0.530132	-0.788056	-0.673325	-0.600625
		0.257512	-0.788056	0.848493	-0.558227	-0.53249	-0.673325	-0.600625	-0.516565
		0.807638	-0.673325	0.788792	-0.588225	-0.525941	-0.600625	-0.516565	-0.496118
		1.28724	-0.600625	0.78193	-0.546689	-0.535372	-0.516565	-0.496118	-0.664238
		1.77937	-0.516565	0.835798	-0.544382	-0.534586	-0.496118	-0.664238	-0.845989
		2.09283	-0.496118	0.929811	-0.56515	-0.532752	-0.664238	-0.845989	-1.05955
		2.19157	-0.664238	1.00358	-0.546689	-0.538515	-0.845989	-1.05955	-1.2004
		2.39689	-0.845989	1.13087	-0.576687	-0.528822	-1.05955	-1.2004	-1.26742
		1.84677	-1.05955	1.22523	-0.484386	-0.521226	-1.2004	-1.26742	-1.27992
		1.56622	-1.2004	1.32405	-0.449772	-0.511271	-1.26742	-1.27992	-1.31286
		1.11326	-1.26742	1.38821	-0.31132	-0.511009	-1.27992	-1.31286	-1.33899
		1.08975	-1.27992	1.36831	-0.355163	-0.499482	-1.31286	-1.33899	-1.36852
		0.848388	-1.31286	1.31341	-0.19825	-0.499221	-1.33899	-1.36852	-1.37875
		0.545897	-1.33899	1.25028	-0.232863	-0.504198	-1.36852	-1.37875	-1.34012
		0.172877	-1.36852	1.18749	-0.260554	-0.509175	-1.37875	-1.34012	-1.2572
		-0.018335	-1.37875	1.15729	-0.225941	-0.524107	-1.34012	-1.2572	-1.13906
		0.00204009	-1.34012	1.11029	-0.117486	-0.513891	-1.2572	-1.13906	-1.18677
		0.0286844	-1.2572	1.08798	0.05558	-0.533014	-1.13906	-1.18677	-1.26515
		0.444022	-1.13906	1.08455	0.210185	-0.530132	-1.18677	-1.26515	-1.23789
		0.539628	-1.18677	1.08249	0.3371	-0.529084	-1.26515	-1.23789	-1.23675
		0.110185	-1.26515	1.03274	0.320948	-0.488218	-1.23789	-1.23675	-1.21858
		0.0851076	-1.23789	1.09176	0.383251	-0.455472	-1.23675	-1.21858	-1.2697
		0.185415	-1.23675	1.10308	0.3371	-0.482455	-1.21858	-1.2697	-1.34126
		0.668147	-1.21858	1.19195	0.699385	-0.522273	-1.2697	-1.34126	-1.2856
		1.07565	-1.2697	1.24238	1.06398	-0.486908	-1.34126	-1.2856	-1.28446
		0.62583	-1.34126	1.18886	1.0709	-0.493981	-1.2856	-1.28446	-1.26856
		0.896975	-1.2856	1.16244	1.0409	-0.513105	-1.28446	-1.26856	-1.32536
		0.878167	-1.28446	1.16004	0.800917	-0.501316	-1.26856	-1.32536	-1.35603
		1.11326	-1.26856	1.1621	0.904757	-0.478525	-1.32536	-1.35603	-1.33104
		1.08035	-1.32536	1.22454	1.0109	-0.520702	-1.35603	-1.33104	-1.27083
		0.901677	-1.35603	1.27944	1.23704	-0.531704	-1.33104	-1.27083	-1.27083
		1.38441	-1.33104	1.29797	1.64779	-0.531704	-1.27083	-1.27083	-1.24584
		1.72765	-1.27083	1.26091	1.5301	-0.513367	-1.27083	-1.24584	-1.13793
		1.23865	-1.27083	1.28459	1.30627	-0.552399	-1.24584	-1.13793	-1.13111
		1.4471	-1.24584	1.30929	1.29704	-0.562354	-1.13793	-1.13111	-1.21858
		2.10537	-1.13793	1.35081	1.48857	-0.551613	-1.13111	-1.21858	-1.2572
		2.59594	-1.13111	1.39987	1.47934	-0.546112	-1.21858	-1.2572	-1.36739
		2.64453	-1.21858	1.46884	1.52779	-0.546112	-1.2572	-1.36739	-1.39579
		2.67431	-1.2572	1.50864	1.65702	-0.536157	-1.36739	-1.39579	-1.36852
		2.17903	-1.36739	1.51035	1.85085	-0.508913	-1.39579	-1.36852	-1.32422
		1.57092	-1.39579	1.48805	1.73778	-0.509175	-1.36852	-1.32422	-1.26402
		1.58973	-1.36852	1.51001	1.50241	-0.516772	-1.32422	-1.26402	-1.18677
		2.16336	-1.32422	1.52923	1.54164	-0.514676	-1.26402	-1.18677	-1.23903
		3.17741	-1.26402	1.58241	1.5301	-0.493719	-1.18677	-1.23903	-1.36398
		3.97361	-1.18677	1.64451	1.60625	-0.489004	-1.23903	-1.36398	-1.36852
		4.30744	-1.23903	1.63662	1.42395	-0.495553	-1.36398	-1.36852	-1.29809
		1.97999	-1.36398	1.60574	1.29935	-0.498697	-1.36852	-1.29809	-1.17768
		1.34209	-1.36852	1.60299	1.2855	-0.477477	-1.29809	-1.17768	-1.33899
		1.16655	-1.29809	1.58653	1.23474	-0.478525	-1.17768	-1.33899	-1.39692
		2.9141	-1.17768	1.62976	1.23474	-0.471976	-1.33899	-1.39692	-1.45258
		1.14304	-1.33899	1.60299	1.30165	-0.491886	-1.39692	-1.45258	-1.31854
		1.34523	-1.39692	1.65137	1.29935	-0.493981	-1.45258	-1.31854	-1.28333
		1.27313	-1.45258	1.66784	1.20012	-0.479049	-1.31854	-1.28333	-1.35716
		1.72295	-1.31854	1.67573	1.14474	-0.474072	-1.28333	-1.35716	-1.41737
		2.08813	-1.28333	1.71485	1.04782	-0.46988	-1.35716	-1.41737	-1.45372
		2.36868	-1.35716	1.72514	0.992443	-0.462284	-1.41737	-1.45372	-1.4185
		1.19947	-1.41737	1.7073	0.830915	-0.482979	-1.45372	-1.4185	-1.38329
		0.740244	-1.45372	1.71965	0.731691	-0.482717	-1.4185	-1.38329	-1.39465
		1.18536	-1.4185	1.75431	0.597853	-0.489266	-1.38329	-1.39465	-1.55368
		1.22611	-1.38329	1.7694	0.558625	-0.497911	-1.39465	-1.55368	-1.56163
		1.81699	-1.39465	1.77867	0.535549	-0.50446	-1.55368	-1.56163	-1.46394
		0.729272	-1.55368	1.74436	0.517089	-0.527775	-1.56163	-1.46394	-1.45713
		0.191685	-1.56163	1.71759	0.528627	-0.521226	-1.46394	-1.45713	-1.4878
		0.412676	-1.46394	1.68774	0.468631	-0.524631	-1.45713	-1.4878	-1.4594
		0.589782	-1.45713	1.65721	0.304795	-0.518606	-1.4878	-1.4594	-1.46508
		0.296695	-1.4878	1.67573	0.235568	-0.515986	-1.4594	-1.46508	-1.42986
		-0.00422916	-1.4594	1.69083	0.387866	-0.523059	-1.46508	-1.42986	-1.46621
		0.182281	-1.46508	1.67608	0.542472	-0.538253	-1.42986	-1.46621	-1.431
		0.860926	-1.42986	1.63765	0.715538	-0.573618	-1.46621	-1.431	-1.40715
		1.00982	-1.46621	1.57006	0.671694	-0.617105	-1.431	-1.40715	-1.38783
		0.558435	-1.431	1.50864	0.697077	-0.597719	-1.40715	-1.38783	-1.56959
		0.331175	-1.40715	1.44585	0.567855	-0.574142	-1.38783	-1.56959	-1.62752
		0.254377	-1.38783	1.43933	0.445555	-0.582263	-1.56959	-1.62752	-1.56277
		0.248108	-1.56959	1.47707	0.390174	-0.567855	-1.62752	-1.56277	-1.39579
		0.519253	-1.62752	1.51516	0.408634	-0.532228	-1.56277	-1.39579	-1.42759
		0.0396555	-1.56277	1.53918	0.424787	-0.584097	-1.39579	-1.42759	-1.4151
		-0.00109454	-1.39579	1.55839	0.512474	-0.602434	-1.42759	-1.4151	-1.36512
		0.473801	-1.42759	1.53712	0.604776	-0.614485	-1.4151	-1.36512	-1.31741
		1.06311	-1.4151	1.51138	0.623236	-0.586193	-1.36512	-1.31741	-1.33558
		0.555301	-1.36512	1.49457	0.604776	-0.589598	-1.31741	-1.33558	-1.3708
		0.679118	-1.31741	1.47845	0.535549	-0.594314	-1.33558	-1.3708	-1.41737
		0.757484	-1.33558	1.47158	0.627851	-0.568117	-1.3708	-1.41737	-1.40715
		1.06781	-1.3708	1.47776	0.690155	-0.559996	-1.41737	-1.40715	-1.36739
		0.755917	-1.41737	1.46232	0.821685	-0.531704	-1.40715	-1.36739	-1.36966
		0.622695	-1.40715	1.46712	0.847068	-0.539039	-1.36739	-1.36966	-1.41055
		0.622695	-1.36739	1.50143	0.80784	-0.547422	-1.36966	-1.41055	-1.39465
		0.738676	-1.36966	1.49903	0.770919	-0.555543	-1.41055	-1.39465	-1.34808
		1.01609	-1.41055	1.52477	0.773226	-0.540611	-1.39465	-1.34808	-1.57299
		1.23708	-1.39465	1.54947	0.895526	-0.573356	-1.34808	-1.57299	-1.57981
		1.33739	-1.34808	1.54089	1.19781	-0.606102	-1.57299	-1.57981	-1.548
		1.27783	-1.57299	1.56285	1.10321	-0.602696	-1.57981	-1.548	-1.47985
		0.710465	-1.57981	1.52991	0.990136	-0.596933	-1.548	-1.47985	-1.41623
		-0.0543831	-1.548	1.48428	0.634774	-0.611079	-1.47985	-1.41623	-1.31627
		-0.165662	-1.47985	1.45546	0.489398	-0.614747	-1.41623	-1.31627	-1.2129
		-0.195441	-1.41623	1.3659	0.221723	-0.604792	-1.31627	-1.2129	-1.13225
		-0.403893	-1.31627	1.27978	0.272489	-0.592218	-1.2129	-1.13225	-1.13793
		-0.519874	-1.2129	1.25782	0.639389	-0.636228	-1.13225	-1.13793	-1.11294
		-0.436807	-1.13225	1.21597	1.08475	-0.654303	-1.13793	-1.11294	-1.12089
		-0.314557	-1.13793	1.13808	1.19089	-0.657971	-1.11294	-1.12089	-1.11521
		-0.259701	-1.11294	1.05367	1.08705	-0.639371	-1.12089	-1.11521	-1.06523
		-0.381951	-1.12089	0.949711	0.708615	-0.618938	-1.11521	-1.06523	-0.94936
		-0.20171	-1.11521	0.888637	0.674002	-0.601387	-1.06523	-0.94936	-0.852805
		-0.380384	-1.06523	0.866678	0.860913	-0.593528	-0.94936	-0.852805	-0.882339
		-0.781615	-0.94936	0.884177	1.06859	-0.588812	-0.852805	-0.882339	-0.917553
		-0.907	-0.852805	0.850209	0.980905	-0.604792	-0.882339	-0.917553	-0.892563
		-0.885058	-0.882339	0.759284	1.33627	-0.595885	-0.917553	-0.892563	-0.893699
		-0.910135	-0.917553	0.702328	1.60856	-0.597195	-0.892563	-0.893699	-0.926641
		-0.830202	-0.892563	0.681055	1.32473	-0.611079	-0.893699	-0.926641	-0.966399
		-0.822365	-0.893699	0.68929	1.0109	-0.614747	-0.926641	-0.966399	-0.966399
		-0.839606	-0.926641	0.677281	0.708615	-0.622344	-0.966399	-0.966399	-0.95504
		-0.776913	-0.966399	0.7037	0.505551	-0.629155	-0.966399	-0.95504	-0.926641
		-0.682875	-0.966399	0.711592	0.330178	-0.629941	-0.95504	-0.926641	-0.852805
		-0.629586	-0.95504	0.674879	0.385559	-0.636228	-0.926641	-0.852805	-0.77556
		-0.745567	-0.926641	0.624099	0.30018	-0.639895	-0.852805	-0.77556	-0.707404
		-0.858414	-0.852805	0.557878	0.228646	-0.643563	-0.77556	-0.707404	-0.656286
		-0.798856	-0.77556	0.494746	0.316333	-0.637014	-0.707404	-0.656286	-0.556323
		-0.649961	-0.707404	0.428182	0.699385	-0.639895	-0.656286	-0.556323	-0.475671
		-0.513605	-0.656286	0.382205	0.992443	-0.641467	-0.556323	-0.475671	-0.426826
		-0.524576	-0.556323	0.321132	0.893219	-0.6378	-0.475671	-0.426826	-0.437049
		-0.67974	-0.475671	0.242902	0.717845	-0.656923	-0.426826	-0.437049	-0.482487
		-0.67974	-0.426826	0.197955	0.593238	-0.654565	-0.437049	-0.482487	-0.440457
		-0.499499	-0.437049	0.16982	1.0109	-0.64723	-0.482487	-0.440457	-0.400699
		-0.543384	-0.482487	0.146488	1.47011	-0.654303	-0.440457	-0.400699	-0.397291
		-0.443076	-0.440457	0.103599	1.42857	-0.650898	-0.400699	-0.397291	-0.413194
		-0.670336	-0.400699	0.078552	1.44703	-0.644873	-0.397291	-0.413194	-0.373436
		-0.671904	-0.397291	0.0346338	1.31781	-0.642515	-0.413194	-0.373436	-0.316639
		-0.391355	-0.413194	0.0325751	1.15397	-0.602696	-0.373436	-0.316639	-0.267793
		-0.413297	-0.373436	0.0610533	0.83553	-0.597981	-0.316639	-0.267793	-0.295056
		-0.397624	-0.316639	0.0624258	0.782457	-0.58986	-0.267793	-0.295056	-0.339358
		-0.240893	-0.267793	0.0308596	0.973983	-0.586193	-0.295056	-0.339358	-0.300736
		-0.344336	-0.295056	-0.0370764	1.00398	-0.59117	-0.339358	-0.300736	-0.0905861
		-0.220518	-0.339358	-0.101238	0.973983	-0.540349	-0.300736	-0.0905861	0.0911649
		-0.352172	-0.300736	-0.108444	0.849375	-0.386576	-0.0905861	0.0911649	0.0923009
		-0.479124	-0.0905861	-0.0782498	0.687847	-0.29384	0.0911649	0.0923009	0.111612
		-0.521442	0.0911649	-0.101924	0.791687	-0.2831	0.0923009	0.111612	0.00824099
		-0.646827	0.0923009	-0.147901	0.856298	-0.289125	0.111612	0.00824099	-0.112169
		-0.690711	0.111612	-0.0940329	0.897834	-0.32842	0.00824099	-0.112169	-0.186005
		-0.773779	0.00824099	-0.097464	0.71323	-0.379503	-0.112169	-0.186005	-0.214404
		-0.670336	-0.112169	-0.136579	-0.283629	-0.373216	-0.186005	-0.214404	-0.198501
		-0.559057	-0.186005	-0.143784	-0.765906	-0.392863	-0.214404	-0.198501	-0.154199
		-0.570028	-0.214404	-0.123197	-0.685142	-0.413296	-0.198501	-0.154199	-0.0860424
		-0.714221	-0.198501	-0.132118	-0.682834	-0.417488	-0.154199	-0.0860424	0.0207364
		-0.667202	-0.154199	-0.155107	-0.650529	-0.424561	-0.0860424	0.0207364	0.116156
		-0.704817	-0.0860424	-0.233336	-0.608993	-0.431372	0.0207364	0.116156	0.209303
		-0.684442	0.0207364	-0.346563	-0.322857	-0.434515	0.116156	0.209303	0.304722
		-0.733029	0.116156	-0.430282	-0.0136464	-0.42849	0.209303	0.304722	0.347888
		-0.803558	0.209303	-0.516403	0.0232743	-0.43242	0.304722	0.347888	0.393326
		-0.842741	0.304722	-0.582623	-0.045952	-0.431372	0.347888	0.393326	0.374015
		-0.867817	0.347888	-0.670803	-0.0274917	-0.449709	0.393326	0.374015	0.371743
		-0.80199	0.393326	-0.755551	0.0140441	-0.444208	0.374015	0.371743	0.394462
		-0.869385	0.374015	-0.803243	0.263259	-0.435825	0.371743	0.394462	0.383103
		-0.809827	0.371743	-0.794666	0.505551	-0.415654	0.394462	0.383103	0.364927
		-0.84901	0.394462	-0.751091	0.542472	-0.391553	0.383103	0.364927	0.297907
		-0.729894	0.383103	-0.706486	0.385559	-0.308772	0.364927	0.297907	0.247925
		-0.61548	0.364927	-0.703741	0.16865	-0.186697	0.297907	0.247925	0.18204
		-0.706384	0.297907	-0.672175	0.0578875	-0.0866266	0.247925	0.18204	0.121835
		-0.756538	0.247925	-0.650559	-0.0782577	-0.0803394	0.18204	0.121835	0.0445912
		-0.748702	0.18204	-0.61762	-0.168252	-0.0861026	0.121835	0.0445912	-0.0190217
		-0.744	0.121835	-0.592916	-0.214403	-0.108108	0.0445912	-0.0190217	-0.0417405
		-0.759673	0.0445912	-0.569585	-0.221325	-0.173075	-0.0190217	-0.0417405	-0.0667313
		-0.731461	-0.0190217	-0.513315	-0.214403	-0.281004	-0.0417405	-0.0667313	-0.140568
		-0.783183	-0.0417405	-0.444349	-0.0736426	-0.370596	-0.0667313	-0.140568	-0.222356
		-0.781615	-0.0667313	-0.40695	0.131729	-0.434253	-0.140568	-0.222356	-0.224628
		-0.86625	-0.140568	-0.406264	0.251721	-0.507341	-0.222356	-0.224628	-0.213268
		-0.839606	-0.222356	-0.412783	0.445555	-0.549518	-0.224628	-0.213268	-0.180326
		-0.95402	-0.224628	-0.406607	0.701693	-0.551351	-0.213268	-0.180326	-0.168966
		-0.902298	-0.213268	-0.42239	0.895526	-0.583049	-0.180326	-0.168966	-0.157607
		-0.847442	-0.180326	-0.453613	1.21166	-0.612913	-0.168966	-0.157607	-0.124664
		-0.872519	-0.168966	-0.481405	1.65932	-0.621034	-0.157607	-0.124664	-0.0451484
		-0.886625	-0.157607	-0.50508	1.71701	-0.618676	-0.124664	-0.0451484	0.0729898
		-0.870952	-0.124664	-0.536646	1.68932	-0.610555	-0.0451484	0.0729898	0.22407
		-0.875654	-0.0451484	-0.581937	1.74009	-0.600077	0.0729898	0.22407	0.341073
		-0.911702	0.0729898	-0.655706	1.94546	-0.598505	0.22407	0.341073	0.402414
		-0.928943	0.22407	-0.772707	1.95469	-0.60453	0.341073	0.402414	0.411501
		-0.936779	0.341073	-0.911667	1.96853	-0.590384	0.402414	0.411501	0.446715
		-0.900731	0.402414	-0.994699	1.61779	-0.586717	0.411501	0.446715	0.510328
		-0.93051	0.411501	-1.05783	1.53472	-0.590646	0.446715	0.510328	0.614835
		-0.952452	0.446715	-1.10827	1.46549	-0.595623	0.510328	0.614835	0.647778
		-0.917971	0.510328	-1.14327	1.44703	-0.602434	0.614835	0.647778	0.650049
		-0.883491	0.614835	-1.15871	1.52779	-0.602434	0.647778	0.650049	0.610291
		-0.853712	0.647778	-1.20091	1.75163	-0.595623	0.650049	0.610291	0.559174
		-0.850577	0.650049	-1.24757	1.88085	-0.588288	0.610291	0.559174	0.537591
		-0.838039	0.610291	-1.25169	1.79085	-0.569427	0.559174	0.537591	0.47625
		-0.78475	0.559174	-1.23179	1.66855	-0.549256	0.537591	0.47625	0.377423
		-0.769077	0.537591	-1.18753	1.66855	-0.536681	0.47625	0.377423	0.396734
		-0.775346	0.47625	-1.14327	1.94084	-0.526465	0.377423	0.396734	0.609155
		-0.794154	0.377423	-1.08631	2.41158	-0.526989	0.396734	0.609155	0.727294
		-0.869385	0.396734	-1.04205	2.42543	-0.518344	0.609155	0.727294	0.729565
		-0.888193	0.609155	-0.975485	2.79464	-0.403604	0.727294	0.729565	0.64437
		-0.667202	0.727294	-0.91201	2.34236	-0.355664	0.729565	0.64437	0.556902
		-0.707952	0.729565	-0.879071	1.48857	-0.394959	0.64437	0.556902	0.533047
		-0.739298	0.64437	-0.890394	1.64548	-0.307725	0.556902	0.533047	0.642098
		-0.682875	0.556902	-0.927107	1.17935	-0.17779	0.533047	0.642098	0.944259
		-0.67974	0.533047	-0.964849	0.521704	-0.16705	0.642098	0.944259	0.805674
		-0.695413	0.642098	-0.987151	0.334793	-0.173861	0.944259	0.805674	0.823849
		-0.565326	0.944259	-0.98921	0.150189	-0.153166	0.805674	0.823849	0.835208
		-0.468153	0.805674	-1.00602	0.0509649	-0.100773	0.823849	0.835208	0.857927
		-0.436807	0.823849	-0.944948	0.775534	0.719962	0.835208	0.857927	0.926084
		-0.220518	0.835208	-0.784029	-0.184405	1.79821	0.857927	0.926084	0.897685
		-0.272239	0.857927	-0.801528	-0.537459	1.65517	0.926084	0.897685	0.787499
		-0.361576	0.926084	-0.871179	-0.20748	1.21324	0.897685	0.787499	0.736381
		-0.400759	0.897685	-0.926077	0.207878	1.06968	0.787499	0.736381	0.71707
		-0.421134	0.787499	-0.991955	0.30941	0.988213	0.736381	0.71707	0.712526
		-0.430538	0.736381	-1.03725	0.510166	0.824486	0.71707	0.712526	0.662545
		-0.471288	0.71707	-1.06264	0.491706	0.637181	0.712526	0.662545	0.823849
		-0.540249	0.712526	-1.07842	0.447863	0.436778	0.662545	0.823849	0.881782
		-0.628019	0.662545	-1.06401	0.482476	0.277504	0.823849	0.881782	0.904501
		-0.668769	0.823849	-1.03107	0.597853	0.154905	0.881782	0.904501	0.954482
		-0.53398	0.881782	-0.994699	0.480168	-0.0282085	0.904501	0.954482	1.0181
		-0.698548	0.904501	-0.937743	0.376329	-0.0198256	0.954482	1.0181	1.034
		-0.675038	0.954482	-0.858141	0.394789	0.263358	1.0181	1.034	1.09534
		-0.57473	1.0181	-0.847505	-0.553612	0.284315	1.034	1.09534	1.18054
		-0.576298	1.034	-0.877699	-0.731293	0.320728	1.09534	1.18054	1.15327
		-0.552788	1.09534	-0.878728	-0.518999	0.741967	1.18054	1.15327	1.27255
		-0.369413	1.18054	-0.872895	-0.159022	1.82074	1.15327	1.27255	1.37251
		-0.366278	1.15327	-0.875297	-0.83744	1.92081	1.27255	1.37251	1.46793
		-0.441509	1.27255	-0.909265	-1.12358	1.50166	1.37251	1.46793	1.56221
		-0.316124	1.37251	-0.960388	-1.29433	1.52524	1.46793	1.56221	1.50314
		-0.137451	1.46793	-0.976515	-1.20203	2.62706	1.56221	1.50314	1.54517
		0.0960787	1.56221	-0.977887	-1.34279	3.63956	1.50314	1.54517	1.54631
		-0.0747581	1.50314	-1.00465	-1.21126	3.45801	1.54517	1.54631	1.50428
		-0.186037	1.54517	-1.08254	-1.11896	2.69255	1.54631	1.50428	1.36797
		-0.345903	1.54631	-1.14018	-0.851285	2.15134	1.50428	1.36797	1.20439
		-0.450913	1.50428	-1.17449	-0.57438	1.67718	1.36797	1.20439	1.14078
		-0.515173	1.36797	-1.13949	-0.546689	1.53834	1.20439	1.14078	1.14419
		-0.552788	1.20439	-1.09729	-0.546689	1.37566	1.14078	1.14419	1.15554
		-0.642125	1.14078	-1.02592	-0.500538	1.1171	1.14419	1.15554	1.24528
		-0.726759	1.14419	-0.943576	-0.742831	0.849634	1.15554	1.24528	1.23052
		-0.747135	1.15554	-0.906863	-0.964355	0.679095	1.24528	1.23052	1.24983
		-0.756538	1.24528	-0.892452	-1.04743	0.722582	1.23052	1.24983	1.22484
		-0.628019	1.23052	-0.857798	-1.38664	1.29655	1.24983	1.22484	1.37933
		-0.601375	1.24983	-0.803243	-1.93122	2.12933	1.22484	1.37933	1.49519
		-0.599807	1.22484	-0.76207	-2.12043	1.99678	1.37933	1.49519	1.52245
		-0.657798	1.37933	-0.758639	-1.95198	1.75786	1.49519	1.52245	1.42476
		-0.551221	1.49519	-0.763099	-2.0489	2.56576	1.52245	1.42476	1.35661
		-0.37098	1.52245	-0.780941	-2.02583	3.70138	1.42476	1.35661	1.38387
		-0.341201	1.42476	-0.790548	-2.27966	3.50202	1.35661	1.38387	1.5713
		-0.468153	1.35661	-0.750404	-2.11582	2.89898	1.38387	1.5713	1.46452
		-0.59824	1.38387	-0.686929	-2.05121	2.09004	1.5713	1.46452	1.35661
		-0.695413	1.5713	-0.702369	-2.03967	1.51371	1.46452	1.35661	1.20553
		-0.734596	1.46452	-0.810449	-2.10659	1.17552	1.35661	1.20553	1.08171
		-0.744	1.35661	-0.933969	-1.97506	0.860899	1.20553	1.08171	1.15668
		-0.773779	1.20553	-1.02009	-1.62431	0.620939	1.08171	1.15668	1.27823
		-0.859981	1.08171	-1.03004	-1.59431	0.421584	1.15668	1.27823	1.34865
		-0.864683	1.15668	-0.938429	-1.46048	0.366048	1.27823	1.34865	1.33502
		-0.875654	1.27823	-0.838241	-1.5897	0.513534	1.34865	1.33502	1.23392
		-0.935212	1.34865	-0.826232	-2.12505	0.716556	1.33502	1.23392	1.05899
		-0.968125	1.33502	-0.900001	-2.45734	0.549947	1.23392	1.05899	0.997648
		-0.955587	1.23392	-1.00705	-2.30273	0.26362	1.05899	0.997648	0.916996
		-0.95402	1.05899	-1.04102	-1.99583	0.108799	0.997648	0.916996	0.923812
		-0.932077	0.997648	-1.04411	-1.63816	-0.00279794	0.916996	0.923812	0.980609
		-0.946183	0.916996	-1.01769	-1.29664	-0.0748382	0.923812	0.980609	0.971522
		-0.928943	0.923812	-0.993327	-0.980508	-0.128803	0.980609	0.971522	0.96925
		-0.897596	0.980609	-0.97377	-0.611301	-0.0342337	0.971522	0.96925	0.987425
		-0.861548	0.971522	-0.939802	-0.355163	-0.0156342	0.96925	0.987425	0.985153
		-0.839606	0.96925	-0.918186	-0.117486	0.304224	0.987425	0.985153	0.938579
		-0.753404	0.987425	-0.940488	-0.306705	0.51432	0.985153	0.938579	0.861335
		-0.789452	0.985153	-0.971711	-0.242093	0.307106	0.938579	0.861335	0.855655
		-0.764375	0.938579	-1.01769	-0.0874878	0.112728	0.861335	0.855655	0.839752
		-0.800423	0.861335	-1.04342	0.134036	-0.0198256	0.855655	0.839752	0.740925
		-0.839606	0.855655	-1.03244	0.30941	-0.0897701	0.839752	0.740925	0.714798
		-0.805125	0.839752	-0.995043	0.521704	-0.166002	0.740925	0.714798	0.630738
		-0.830202	0.740925	-0.939802	0.729383	-0.228611	0.714798	0.630738	0.558038
		-0.830202	0.714798	-0.892452	0.874758	-0.280742	0.630738	0.558038	0.540999
		-0.874087	0.630738	-0.86569	0.886296	-0.31506	0.558038	0.540999	0
		-0.856846	0.558038	-0.846819	0.856298	-0.334707	0.540999	0	0
		-0.764375	0.540999	-0.82383	0.95783	-0.350163	0	0	0

## Sheet: Sheet2
		DO
	mean	11.0078
	S	1.834
